# Supplementary material
Source: publisher figshare collection journal article supplement (https://tandf.figshare.com/ndownloader/files/22395246)
Supplement: Supplementary file 1 [file 22395246]

**Supplemental information**

**Table S1. Primer sequences**

| **genotyping primers** | **Rybp-Fl/WT-F** | **CACAGAACCGGACAAGGAGT** |
| --- | --- | --- |
| **Rybp-Fl/WT-R** | **TAGTGTGCAGATCATCGCATA** |
| **Stra8-Cre-F** | **GTGCAAGCTGAACAACAGGA** |
| **Stra8-Cre-R** | **CCAGCATCCACATTCTCCTT** |
| **ZP3-Cre-F** | **CCCAACCAACCGAAGAAATA** |
| **ZP3-Cre-R** | **GCCGCATAACCAGTGAAACA** |
| **primers for qRT-PCR** | **Rybp-F** | **GAAAGATCCTCCTAGTGAAGC** |
| **Rybp-R** | **GTGACGTTGCCCACAGTTA** |
| **LINE1-F** | **AGTGCAGAGTTCTATCAGACCTTC** |
| **LINE1-R** | **AACCTACTTGGTCAGGATGGATG** |
| **IAP-F** | **CTCCATGTGCTCTGCCTTCC** |
| **IAP-R** | **CCCCGTCCCTTTTTTAGGAGA** |
| **SINEB2-F** | **GAGCACCTGACTGCTCTTCC** |
| **SINEB2-R** | **ACACACCAGAAGAGGGCATC** |
| **MuERVL-F** | **CTCTACCACTTGGACCATATGAC** |
| **MuERVL-R** | **GAGGCTCCAAACAGCATCTCTA** |
| **Zscan4-F** | **GAGATTCATGGAGAGTCTGACTGATGAGTG** |
| **Zscan4-R** | **GCTGTTGTTTCAAAAGCTTGATGACTTC** |
| **4-qB3-277-F** | **TCTTAGGCAATGGGGTTGTC** |
| **4-qB3-277-R** | **AGTGGGAAAATGAGCACCAC** |
| **15-qD1-17920-F** | **AGCAACTATCTCCCGAGCAA** |
| **15-qD1-17920-R** | **GGCTTCCAGAAACAGAGCAC** |
| **18-qE1-1295-F** | **AGCAGAGGCTATCTGGGTGA** |
| **18-qE1-1295-R** | **TTGACTCCTCAGCCTCCTGT** |
| **Gapdh-F** | **TCTTCCAGGAGCGAGACCC** |
| **Gapdh-R** | **CGGAGATGATGACCCTTTT** |


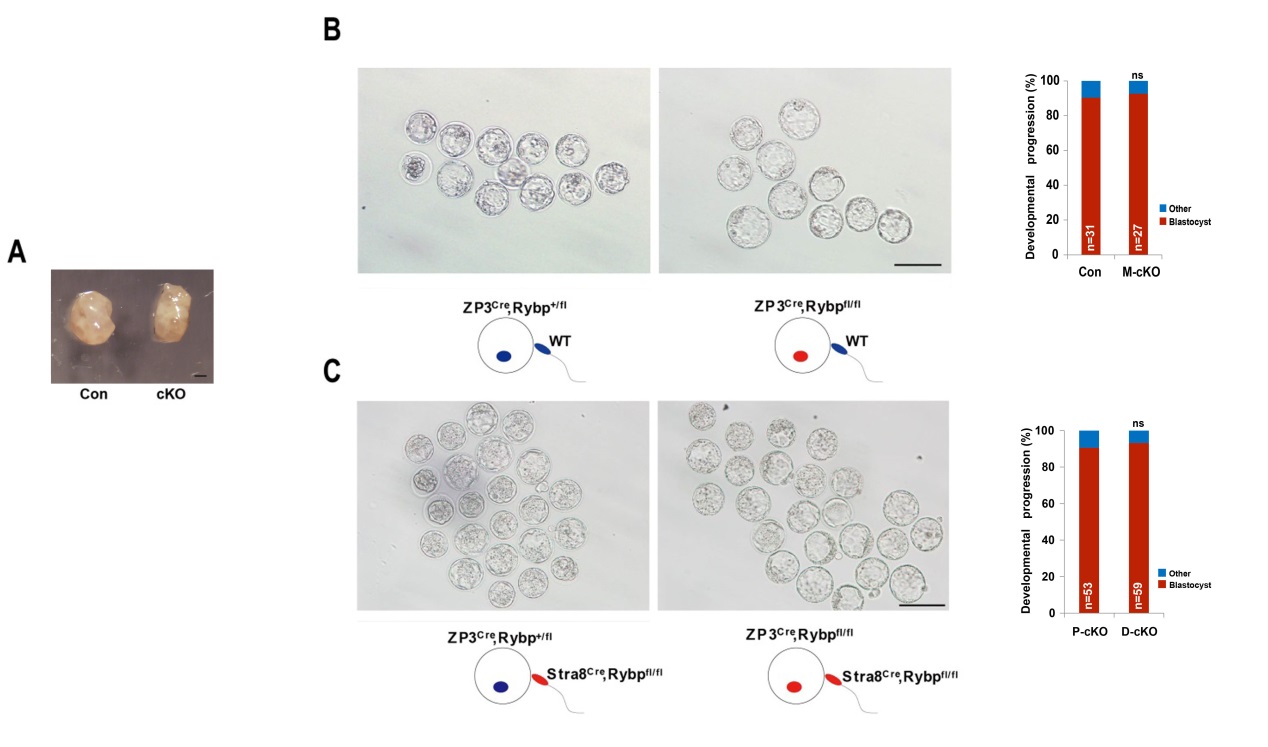


**Figure S1. RYBP is dispensable for oocyte maturation and early embryonic development.**

1. Representative image of ovaries from adult control and cKO mice. Scale bar, 1mm.
2. Representative images of blastocysts produced using control and cKO oocytes. Schematic illustration of mating strategy is shown at bottom of representative images. Developmental progression is summarized at right. Scale bar, 100μm.
3. Representative images of blastocysts produced using control and cKO gametes. Schematic illustration of mating strategy is shown at bottom of representative images. Developmental progression is summarized at right. Scale bar, 100μm.
